# Supplementary material for: Bacterial Pharyngitis, Antimicrobial Susceptibility, and Associated Factors among Children at comprehensive specialized hospitals, Northwest Ethiopia
Source: Research Square preprint supplement (doi:10.21203/rs.3.rs-7276190/v1), 2025-09-09
Supplement: Supplementary file 1 [file e22daf007900181f15deae3c.docx]

**Annex**

**Questionnaire**

Bahir Dar University, College of Medicine and Health Sciences, School of Health Science, Department of Medical Laboratory Science

The purpose of this questionnaire is to **“**Bacterial Pharyngitis, Antimicrobial Susceptibility, and Associated Factors among Children at comprehensive specialized hospitals, Northwest Ethiopia" Your responses will be used for the purposes of research to partially fulfill the requirements for the Master of Arts degree. So you are kindly requested to give your response.

**Patient detail information**

Facility name __________________________Date __________ Participant code ________

Participants address ______________ Tel. ____________

| S.no. | 1.1. Socio- demographic characteristics of the study participant | |
| --- | --- | --- |
| 101 | Age | ………………….. |
| 102 | Sex | 1. Male  2. Female­­­­­­­­­­­­­­­­ |
| 103 | Family number (number of person in housing) | ……………… |
| 104 | Residence of the patient | 1. Rural  2. Urban |
| 105 | Occupation | 1. Unemployed 2. Farmer 3. Merchant 3. Employer 4. Student 5. Others (specify)_______________ |
| 106 | Father educational level | 1. Unable to read &write 2. Primary school 3. Secondary school 4. College and above |
| 107 | Mother educational level | 1. Unable to read &write 2. Primary school 3. Secondary school 4. College and above |

**Environmental explanatory variables of bacterial pharyngitis**

| 108 | Smoking | 1. Yes 2. No |
| --- | --- | --- |
| 109 | Using biomass fuel for cooking | 1. Yes 2. No |
| 110 | Exposed dung/wood as cooking fuel of kitchen | 1. Yes 2. No |
| 111 | If yes kitchen status | 1. Indoor 2. Open door |
| 112 | Living condition | 1. Within the family |
| 1. Orphan |
| 113 | Attending school | 1. Yes 2. No |
| 114 | Living in overcrowded set up | 1. Yes 2. No |

**Clinical information of study participants**

| 115 | Immunization status | 1. Yes 2. No |
| --- | --- | --- |
| 116 | History of pharyngitis-tonsillitis in the last two weeks | 1. Yes 2. No |
| 117 | Tonsillectomy | 1. Yes 2. No |
| 118 | History of hospital visit | 1. Yes 2. No |
| 119 | Nail and/or finger priming with teeth or mouth | 1. Yes 2. No |
| 120 | Recurrences antibiotic use | 1. Yes 2. No |

**Clinical sign**

| 121 | Swollen tonsillitis | 1. Yes 2. No |
| --- | --- | --- |
| 122 | Body temperature | 1. 37 oc  2. >38oc |
| 123 | Difficult to breath | 1. Yes 2. No |
| 124 | Difficult to swallow food | 1. Yes 2. No |
| 125 | White pharyngeal exudate | 1. Yes 2. No |
| 126 | Swollen lymph nodes | 1. Yes 2. No |
| 127 | Weight loss | 1. Yes 2. No |
| 128 | Tonsillar structural change | 1. Yes 2. No |
